# Supplementary material for: Bibliometric Analysis of Global Research on Clavulanic Acid
Source: PubMed Central journal article supplement (PMC6316524; doi:10.3390/antibiotics7040102), 2018-11-26
Supplement: antibiotics-07-00102-s001.pdf [file antibiotics-07-00102-s001.pdf]

## Supplementary Material

This Supplementary Material presents some results related to CA studies in the period of time between 1975 and 2017, and also studies concerning amoxicillin-CA resistance between 1978 and 2017. Additionally, the mathematical equations that represent the profile of number of publications of both cases in the last four decades are presented.

The top 10 researchers (according to the number of publications) in the field of CA are presented in Table S1. Patrice Nordmann and Ronald Jones are considered the most active researchers in this field, by contributing 213 and 209 documents, respectively.

**Table S1.** The top 10 researchers of CA studies.

| Rank | Authors         | Affiliation                                                                                       | No. of publications |
|------|-----------------|---------------------------------------------------------------------------------------------------|---------------------|
| 1    | Nordmann, P.    | Swiss National Reference Center for Emerging Antibiotic Resistance (NARA)                         | 213                 |
| 2    | Jones, R.N.     | JMI Laboratories Incorporated                                                                     | 209                 |
| 3    | Poirel, L.      | Swiss National Reference Center for Emerging Antibiotic Resistance (NARA)                         | 152                 |
| 4    | Brook, I.       | Georgetown University                                                                             | 135                 |
| 5    | Jacobs, M.R.    | NHS Foundation Trust, Department of Infection Public Health England, Antimicrobial Resistance and | 109                 |
| 6    | Livermore, D.M. | Healthcare Associated Infections (AMRHAI) Reference Unit                                          | 109                 |
| 7    | Appelbaum, P.C. | Penn State Health Milton S. Hershey Medical Center.                                               | 93                  |
| 8    | Labia, R.       | Laboratoire Universitaire de Biodiversité et Ecologie Microbienne, Centre de Quimper              | 93                  |
| 9    | Bonomo, R.A.    | Case Western Reserve University                                                                   | 92                  |
| 10   | Baquero, F.     | Hospital Ramon y Cajal                                                                            | 83                  |

The top 10 author keywords with their occurrences of CA studies at 1987, 2002 and 2010 are shown in Tables S2, S3, and S4, respectively.

**Table S2.** The top 10 author keywords of CA studies at 1987.

| Rank | Keywords                          | Occurrences |
|------|-----------------------------------|-------------|
| 1    | Clavulanic acid                   | 3           |
| 2    | Ticarcillin                       | 3           |
| 3    | Timentin                          | 2           |
| 4    | Pharmacokinetics                  | 2           |
| 5    | Antibiotic                        | 2           |
| 6    | Agar disk diffusion test          | 1           |
| 7    | Broth dilution test               | 1           |
| 8    | Minimal inhibitory concentrations | 1           |
| 9    | <i>Pseudomonas aeruginosa</i>     | 1           |
| 10   | <i>Pseudomonas maltophilia</i>    | 1           |

**Table S3.** The top 10 author keywords of CA studies at 2002.

| Rank | Keywords                        | Occurrences |
|------|---------------------------------|-------------|
| 1    | Antibiotics                     | 42          |
| 2    | Resistance                      | 23          |
| 3    | Antibiotic resistance           | 21          |
| 4    | Pneumonia                       | 16          |
| 5    | Antimicrobial resistance        | 16          |
| 6    | Clavulanic acid                 | 16          |
| 7    | <i>Streptococcus pneumoniae</i> | 15          |
| 8    | Macrolides                      | 14          |
| 9    | Infection                       | 14          |
| 10   | Community-acquired<br>Pneumonia | 13          |

**Table S4.** The top 10 author keywords of CA studies at 2010.

| Rank | Keywords                     | Occurrences |
|------|------------------------------|-------------|
| 1    | Antibiotics                  | 73          |
| 2    | <i>Escherichia coli</i>      | 44          |
| 3    | Resistance                   | 38          |
| 4    | Antimicrobial resistance     | 35          |
| 5    | Infection                    | 33          |
| 6    | Antibiotic resistance        | 30          |
| 7    | Children                     | 28          |
| 8    | <i>Staphylococcus aureus</i> | 25          |
| 9    | Pneumonia                    | 25          |
| 10   | Treatment                    | 22          |

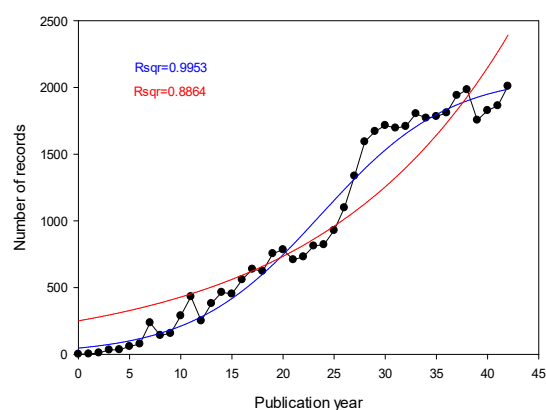

**Figure S1.** Quantitative growth process of the studies concerning clavulanic acid in the period of 1975-2017 (black line) and its prediction (blue line, sigmoidal equation with three parameters. Red line, exponential growth equation with two parameters) of studies.

The sigmoidal equation with three parameters is the following:

$$y = \frac{a}{1 + e^{\left(\frac{-(x-x_0)}{b}\right)}}, \quad (1)$$

where  $y$  is the number of records of publication of CA studies, and  $x$  is the publication year.  $a$ ,  $b$  and  $x_0$  are the parameters of the equation. In this study,  $Rsqr = 0.9953$ .

Table S5. shows the parameter values of the sigmoidal equation and their standard error.

**Table S5.** Parameters values of the sigmoidal equation.

| Coefficient    | Value     | Standard error |
|----------------|-----------|----------------|
| a              | 2095.5264 | 80.6085        |
| b              | 6.2780    | 0.5006         |
| x <sub>0</sub> | 23.7193   | 0.7491         |

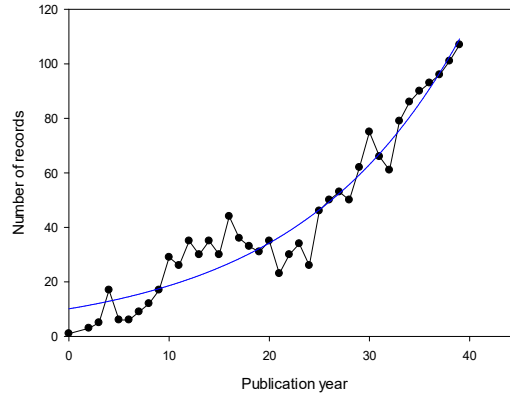

**Figure S2.** Quantitative growth process of the studies concerning amoxicillin-CA resistance between 1978 and 2017 (black line), and its prediction (blue line, exponential growth equation with two parameters) studies.

The exponential growth equation with two parameters is the following:

$$w = c * e^{(d*t)}, \quad (2)$$

where  $w$  is the numbers of records of publication of amoxicillin-CA resistance studies, and  $t$  is the publication year.  $c$  and  $d$  are the parameters of the equation. In this study,  $Rsqr = 0.9317$ .

Table S6 shows the parameter values of exponential growth equation and its standard error.

**Table S6.** Parameter values of the exponential growth equation.

| Coefficient | Value   | Standard error |
|-------------|---------|----------------|
| C           | 10.1122 | 1.1036         |
| D           | 0.0610  | 0.0034         |

The main subject areas of the indexed documents for clavulanic acid production by *Streptomyces clavuligerus* are presented in Figure S3:

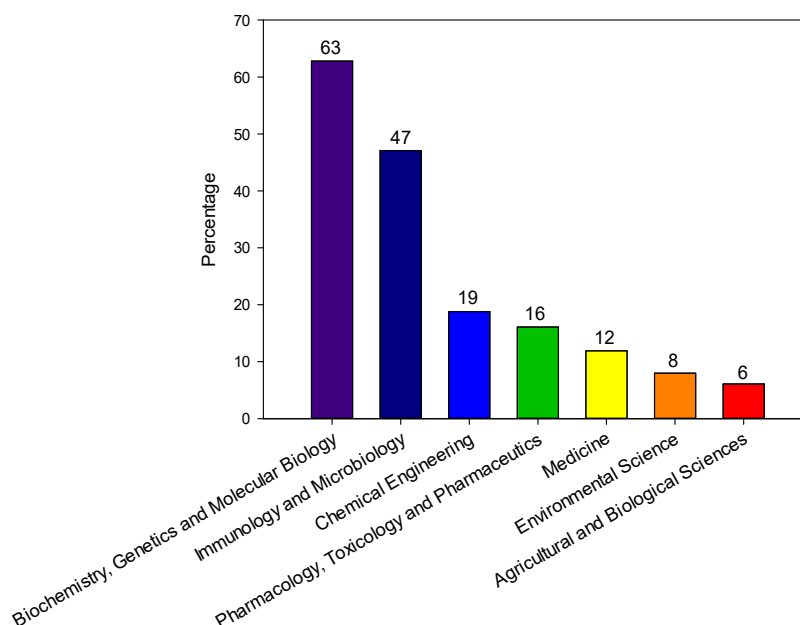

**Figure S3.** Documents grouped by areas for clavulanic acid production by *Streptomyces clavuligerus* between 1976 and 2017. Note: Percentages add up to more than 100 because a document can be indexed for more than one area. Other areas contributed 14.6%.

The top 10 researchers (in connection with number of publications) in the field of CA production by *Streptomyces clavuligerus* are presented in Table S7.

**Table S7.** The top 10 researchers of CA production by *Streptomyces clavuligerus* studies.

| Rank | Authors              | Affiliation                                                                  | No. of publications |
|------|----------------------|------------------------------------------------------------------------------|---------------------|
| 1    | Liras, P.            | Universidad de Leon, Departamento de Biología Molecular                      | 33                  |
| 2    | Jensen, S.E.         | University of Alberta, Department of Biological Sciences                     | 30                  |
| 3    | Hokka, C.O.          | Universidade Federal de Sao Carlos, Department of Chemical Engineering       | 22                  |
| 4    | Martín, J.F          | Universidad de Leon, Departamento de Biología Molecular                      | 21                  |
| 5    | Badino, A.C.         | Universidade Federal de Sao Carlos, Graduate Program of Chemical Engineering | 17                  |
| 6    | Elson, S.W.          | GlaxoSmithKline plc, Spain, Parque Tecnológico de Madrid                     | 14                  |
| 7    | Townsend, C.A.       | Johns Hopkins University, Department of Chemistry                            | 13                  |
| 8    | Pérez-Redondo, R.    | Instituto de Biotecnología de Leon                                           | 11                  |
| 9    | Rodríguez-García, A. | Instituto de Biotecnología de Leon,                                          | 11                  |
| 10   | Santamarta, I.       | Instituto de Biotecnología de Leon,                                          | 11                  |

**Table S8.** The top 10 author keywords of CA and antibiotic resistance studies.

| Rank | Keywords                         | Occurrences |
|------|----------------------------------|-------------|
| 1    | Clavulanic acid                  | 117         |
| 2    | <i>Streptomyces clavuligerus</i> | 76          |
| 3    | <i>Streptomyces</i>              | 10          |
| 4    | Fermentation                     | 9           |
| 5    | Glycerol                         | 8           |
| 6    | $\beta$ -lactam                  | 7           |
| 7    | Antibiotic                       | 7           |
| 8    | <i>S. clavuligerus</i>           | 7           |
| 9    | Strain improvement               | 6           |
| 10   | Regulation                       | 5           |

Table S9 shows the most cited studies related to CA production by *S. clavuligerus*. Only 5 studies have more than 100 citations.

**Table S9.** Most cited global research in the field of CA studies by *S. clavuligerus*.

| Title                                                                                                                                                                                                        | Authors                                                                             | Publication year | Journal                                                                       | No. of citation |
|--------------------------------------------------------------------------------------------------------------------------------------------------------------------------------------------------------------|-------------------------------------------------------------------------------------|------------------|-------------------------------------------------------------------------------|-----------------|
| Clavulanic acid: a beta lactamase inhibiting beta lactam from <i>Streptomyces clavuligerus</i> [1]                                                                                                           | Reading, C.,<br>Cole, M.                                                            | 1977             | Antimicrobial Agents and Chemotherapy<br>11(5), pp. 852-857                   | 584             |
| Clavulanic acid, a novel $\beta$ -lactam isolated from <i>Streptomyces clavuligerus</i> ; X-ray crystal structure analysis [2]                                                                               | Howarth,<br>T.T., Brown,<br>A.G., King,<br>T.J.                                     | 1976             | Journal of the Chemical Society, Chemical Communications<br>(7), pp. 266b-267 | 180             |
| A regulatory gene ( <i>ccaR</i> ) required for cephamycin and clavulanic acid production in <i>Streptomyces clavuligerus</i> : Amplification results in overproduction of both $\beta$ -lactam compounds [3] | Pérez-<br>Llarena, F.J.,<br>Liras, P.,<br>Rodríguez-<br>García, A.,<br>Martin, J.F. | 1997             | Journal of Bacteriology<br>179(6), pp. 2053-2059                              | 129             |
| Purification and Characterization of Clavaminatase Synthase from <i>Streptomyces clavuligerus</i> : An Unusual Oxidative Enzyme in Natural Product Biosynthesis [4]                                          | Salowe, S.P.,<br>Neil Marsh,<br>E.,<br>Townsend,<br>C.A.                            | 1990             | Biochemistry<br>29(27), pp. 6499-6508                                         | 113             |
| Carbon catabolite regulation of cephalosporin production in <i>Streptomyces clavuligerus</i> [5]                                                                                                             | Aharonowitz,<br>Y., Demain,<br>A.L.                                                 | 1978             | Antimicrobial Agents and Chemotherapy<br>14(2), pp. 159-164                   | 112             |

The main subject areas of the indexed documents for clavulanic acid and clavulanate are presented in Figure S4:

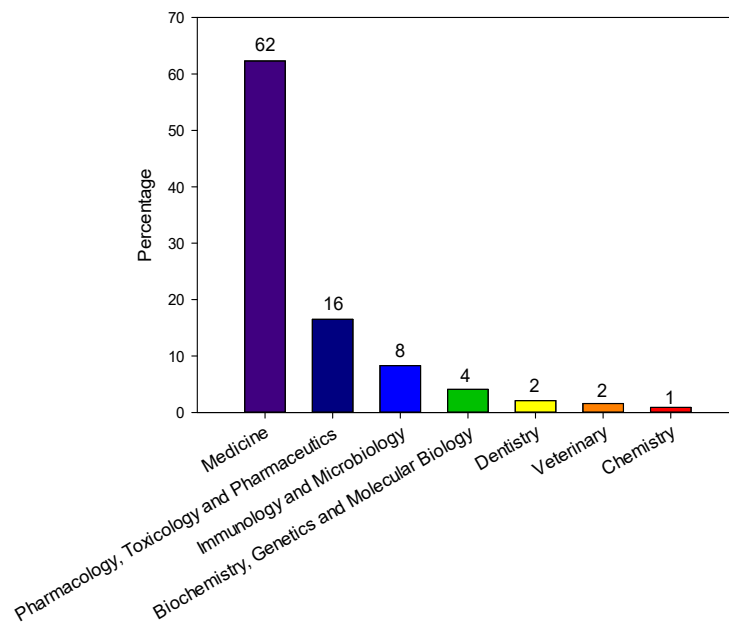

**Figure S4.** Documents grouped by areas for clavulanic acid and clavulanate between 1977 and 2017. Other areas contributed 4.2%.

Top 10 leading countries in the field of clavulanic acid and clavulanate are presented in Figure S5.

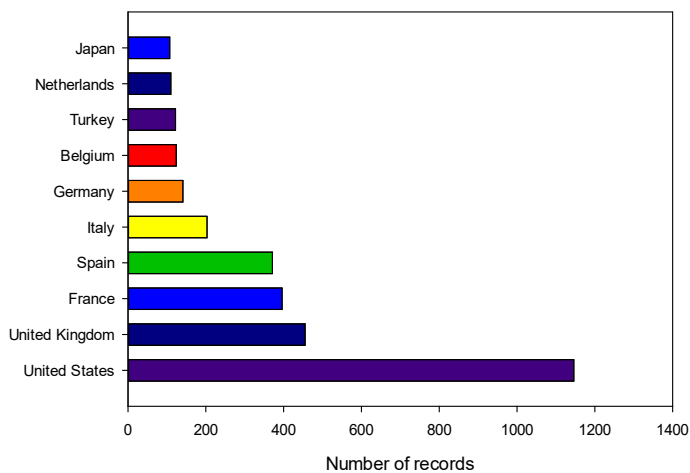

**Figure S5.** Top 10 leading countries in the field of clavulanic acid and clavulanate.

Top 10 leading institutions in the field of clavulanic acid and clavulanate are presented in Figure S6.

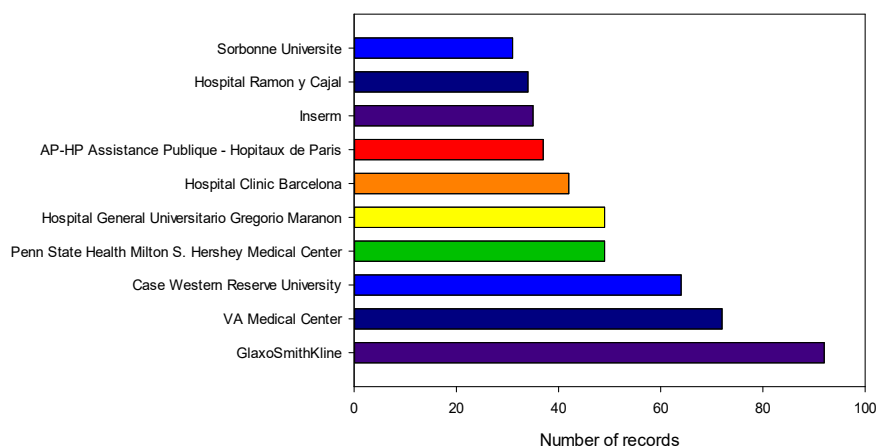

**Figure S6.** Top-10 leading institutions in the field of clavulanic acid and clavulanate.

The top 10 researchers (according to the number of publications) in the field of CA and clavulanate are presented in Table S10.

**Table S10.** The top 10 researchers of CA and clavulanate studies.

| Rank | Authors          | Affiliation                                                                                                  | No. of publications |
|------|------------------|--------------------------------------------------------------------------------------------------------------|---------------------|
| 1    | Jacobs, M.R.     | NHS Foundation Trust, Department of Infection                                                                | 63                  |
| 2    | Appelbaum, P.C.  | Penn State Health Milton S. Hershey Medical Center                                                           | 52                  |
| 3    | Jones, R.N.      | JMI Laboratories Incorporated                                                                                | 32                  |
| 4    | Cohen, R.        | Universite Paris-Est                                                                                         | 27                  |
| 5    | Pichichero, M.E. | Rochester General Hospital, Center for Infectious Diseases and Immunology                                    | 27                  |
| 6    | Livermore, D.M.  | Public Health England, Antimicrobial Resistance and Healthcare Associated Infections (AMRHAI) Reference Unit | 25                  |
| 7    | Aguilar, L.      | PRISM-AG                                                                                                     | 22                  |
| 8    | Baquero, F.      | Hospital Ramon y Cajal                                                                                       | 22                  |
| 9    | Thornsberry, C.  | Eurofins Medinet                                                                                             | 22                  |
| 10   | Bonomo, R.A.     | Case Western Reserve University                                                                              | 21                  |

## Reference

1. Reading, C.; Cole, M. Clavulanic Acid: a Beta-Lactamase-Inhibiting Beta-Lactam from *Streptomyces clavuligerus*. *Antimicrob. Agents Chemother.* **1977**, *11*, 852–857.
2. Howarth, T. T.; Brown, A. G.; King, T. J. Clavulanic acid, a novel  $\beta$ -lactam isolated from *Streptomyces clavuligerus*; X-ray crystal structure analysis. *J. Chem. Soc., Chem. Commun.* **1976**, 266b–267.
3. Pérez-Llarena, F. J.; Liras, P.; Rodríguez-García, A.; Martín, J. F. A regulatory gene (*ccaR*) required for cephamycin and clavulanic acid production in *Streptomyces clavuligerus*: amplification results in overproduction of both beta-lactam compounds. *J. Bacteriol.* **1997**, *179*, 2053–2059.
4. Salowe, S. P.; Marsh, E. N.; Townsend, C. A. Purification and characterization of clavaminase synthase from *Streptomyces clavuligerus*: an unusual oxidative enzyme in natural product biosynthesis. *Biochemistry* **1990**, *29*, 6499–6508.
5. Aharonowitz, Y.; Demain, A. L. Carbon catabolite regulation of cephalosporin production in *Streptomyces clavuligerus*. *Antimicrob. Agents Chemother.* **1978**, *14*, 159–164.
